# Supplementary material for: Multiplexed transcriptome analysis to detect ALK, ROS1 and RET rearrangements in lung cancer
Source: PubMed Central journal article supplement (PMC5299839; doi:10.1038/srep42259), 2017-02-09
Supplement: srep42259-s1.pdf [file srep42259-s1.pdf]

## **Supplementary Material**

### **Multiplexed transcriptome analysis to detect *ALK*, *ROS1* and *RET* rearrangements in lung cancer**

Toni-Maree Rogers, Gisela Mir Arnau, Georgina L. Ryland, Stephen Huang, Maruja E. Lira, Yvette Emmanuel, Omar D. Perez, Darryl Irwin, Andrew P. Fellowes, Stephen Q. Wong, Stephen B. Fox

**Supplementary Table 1. Percent agreement metrics**

| Positive percent agreement:PPA | Negative percent agreement: NPA | Overall percent agreement: OPA |                 |             |             |             |
|--------------------------------|---------------------------------|--------------------------------|-----------------|-------------|-------------|-------------|
| <b>FISH</b>                    |                                 |                                |                 |             |             |             |
|                                | <b>ALK</b>                      | <b>Positive</b>                | <b>Negative</b> | <b>PPA</b>  | <b>NPA</b>  | <b>OPA</b>  |
| <b>Nanostring</b>              | <b>Positive</b>                 | <b>15</b>                      | <b>1</b>        | <b>94%</b>  | <b>97%</b>  | <b>96%</b>  |
|                                | Negative                        | 1                              | 31              |             |             |             |
|                                | Total                           | 16                             | 32              |             |             |             |
|                                | <b>RET</b>                      | <b>Positive</b>                | <b>Negative</b> | <b>PPA</b>  | <b>NPA</b>  | <b>OPA</b>  |
| <b>Nanostring</b>              | <b>Positive</b>                 | <b>0</b>                       | <b>0</b>        | <b>N/A</b>  | <b>100%</b> | <b>100%</b> |
|                                | Negative                        | 0                              | 48              |             |             |             |
|                                | Total                           | 0                              | 48              |             |             |             |
|                                | <b>ROS</b>                      | <b>Positive</b>                | <b>Negative</b> | <b>PPA</b>  | <b>NPA</b>  | <b>OPA</b>  |
| <b>Nanostring</b>              | <b>Positive</b>                 | <b>1</b>                       | <b>0</b>        | <b>100%</b> | <b>100%</b> | <b>100%</b> |
|                                | Negative                        | 0                              | 47              |             |             |             |
|                                | Total                           | 1                              | 47              |             |             |             |
|                                | <b>All fusions</b>              | <b>Positive</b>                | <b>Negative</b> | <b>PPA</b>  | <b>NPA</b>  | <b>OPA</b>  |
| <b>Nanostring</b>              | <b>Positive</b>                 | <b>16</b>                      | <b>1</b>        | <b>94%</b>  | <b>97%</b>  | <b>96%</b>  |
|                                | Negative                        | 1                              | 30              |             |             |             |
|                                | Total                           | 17                             | 31              |             |             |             |

|              |                    |                 |                 |             |             |             |
|--------------|--------------------|-----------------|-----------------|-------------|-------------|-------------|
| <b>FISH</b>  |                    |                 |                 |             |             |             |
|              | <b>ALK</b>         | <b>Positive</b> | <b>Negative</b> | <b>PPA</b>  | <b>NPA</b>  | <b>OPA</b>  |
| <b>Agena</b> | <b>Positive</b>    | <b>16</b>       | <b>1</b>        | <b>94%</b>  | <b>97%</b>  | <b>96%</b>  |
|              | Negative           | 1               | 31              |             |             |             |
|              | Total              | 17              | 32              |             |             |             |
|              | <b>RET</b>         | <b>Positive</b> | <b>Negative</b> | <b>PPA</b>  | <b>NPA</b>  | <b>OPA</b>  |
| <b>Agena</b> | <b>Positive</b>    | <b>1</b>        | <b>0</b>        | <b>100%</b> | <b>100%</b> | <b>100%</b> |
|              | Negative           | 0               | 48              |             |             |             |
|              | Total              | 1               | 48              |             |             |             |
|              | <b>ROS</b>         | <b>Positive</b> | <b>Negative</b> | <b>PPA</b>  | <b>NPA</b>  | <b>OPA</b>  |
| <b>Agena</b> | <b>Positive</b>    | <b>2</b>        | <b>1</b>        | <b>100%</b> | <b>94%</b>  | <b>98%</b>  |
|              | Negative           | 0               | 46              |             |             |             |
|              | Total              | 2               | 47              |             |             |             |
|              | <b>All fusions</b> | <b>Positive</b> | <b>Negative</b> | <b>PPA</b>  | <b>NPA</b>  | <b>OPA</b>  |
| <b>Agena</b> | <b>Positive</b>    | <b>19</b>       | <b>2</b>        | <b>95%</b>  | <b>93%</b>  | <b>94%</b>  |
|              | Negative           | 1               | 27              |             |             |             |
|              | Total              | 20              | 29              |             |             |             |

|                         |                    |                 |                 |             |            |            |
|-------------------------|--------------------|-----------------|-----------------|-------------|------------|------------|
| <b>FISH</b>             |                    |                 |                 |             |            |            |
|                         | <b>ALK</b>         | <b>Positive</b> | <b>Negative</b> | <b>PPA</b>  | <b>NPA</b> | <b>OPA</b> |
| <b>ThermoFisher NGS</b> | <b>Positive</b>    | <b>16</b>       | <b>4</b>        | <b>94%</b>  | <b>88%</b> | <b>90%</b> |
|                         | Negative           | 1               | 30              |             |            |            |
|                         | Total              | 17              | 34              |             |            |            |
|                         | <b>RET</b>         | <b>Positive</b> | <b>Negative</b> | <b>PPA</b>  | <b>NPA</b> | <b>OPA</b> |
| <b>ThermoFisher NGS</b> | <b>Positive</b>    | <b>0</b>        | <b>1</b>        | <b>N/A</b>  | <b>98%</b> | <b>98%</b> |
|                         | Negative           | 0               | 50              |             |            |            |
|                         | Total              | 0               | 51              |             |            |            |
|                         | <b>ROS</b>         | <b>Positive</b> | <b>Negative</b> | <b>PPA</b>  | <b>NPA</b> | <b>OPA</b> |
| <b>ThermoFisher NGS</b> | <b>Positive</b>    | <b>2</b>        | <b>1</b>        | <b>100%</b> | <b>98%</b> | <b>98%</b> |
|                         | Negative           | 0               | 48              |             |            |            |
|                         | Total              | 2               | 49              |             |            |            |
|                         | <b>All fusions</b> | <b>Positive</b> | <b>Negative</b> | <b>PPA</b>  | <b>NPA</b> | <b>OPA</b> |
| <b>ThermoFisher NGS</b> | <b>Positive</b>    | <b>18</b>       | <b>5</b>        | <b>90%</b>  | <b>84%</b> | <b>86%</b> |
|                         | Negative           | 2               | 26              |             |            |            |
|                         | Total              | 20              | 31              |             |            |            |

**Supplementary Table 2. Description of positive control cell lines.**

| <b>Cell line name</b> | <b>Specific fusion</b> |
|-----------------------|------------------------|
| H2228 (FFPE)          | ALK/EML4 v. 3a & 3b    |
| RT-122                | FGFR3-TACC3            |
| H3122                 | ALK/EML4 v. 1          |
| HCC-78                | SLC34A2-ROS1           |

**Supplementary Table 3. Specific fusion detected using the ALK, RET or ROS1 Variant specific Assay by Agena (AbA) Panels**

| Gene           | Variant                   |
|----------------|---------------------------|
| EML4;ALK       | Ee13;Ae20                 |
|                | Ee20;Ae20                 |
|                | Ee6a/b;Ae20               |
|                | Ee14;ins11del49Ae20       |
|                | Ee2;Ae20 & Ee2;ins117Ae20 |
|                | Ee13;ins69Ae20            |
|                | Ee14;del12Ae20            |
|                | Ee15del19;del20Ae20       |
|                | Ee18;Ae20                 |
|                |                           |
| KIF;ALK        | Ke17;Ae20                 |
|                | Ke24;Ae20                 |
|                |                           |
| KIF5B;RET      | Ke15;Re12                 |
|                | Ke16;Re12                 |
|                | Ke22;Re12                 |
|                | Ke23;Re12                 |
|                | Ke24;Re11                 |
|                |                           |
| CCDC6;RET      | Ce1;Re12                  |
|                |                           |
| FIG(GOPC);ROS1 | Fe7;Re35                  |
|                | Fe3;Re36                  |
|                |                           |
| TPM3;ROS1      | Te8;Re35                  |
|                |                           |
| SDCC4;ROS1     | Se2;Re32                  |
|                | Se4;Re32                  |
|                | Se4;Re34                  |
|                |                           |
| SLC34A2;ROS1   | Se12;Re32                 |
|                | Se12;Re34                 |
|                | Se4;Re32                  |
|                | Se4;Re34                  |
|                |                           |
| CD74;ROS1      | Ce6;Re32                  |
|                | Ce6;Re34                  |
|                |                           |
| EZR;ROS1       | Ee10;Re34                 |
|                |                           |
| LRIG3;ROS1     | Le16;Re35                 |

\* **Ee13;Ae20** = ELM4 exon 13 fused with ALK exon 20

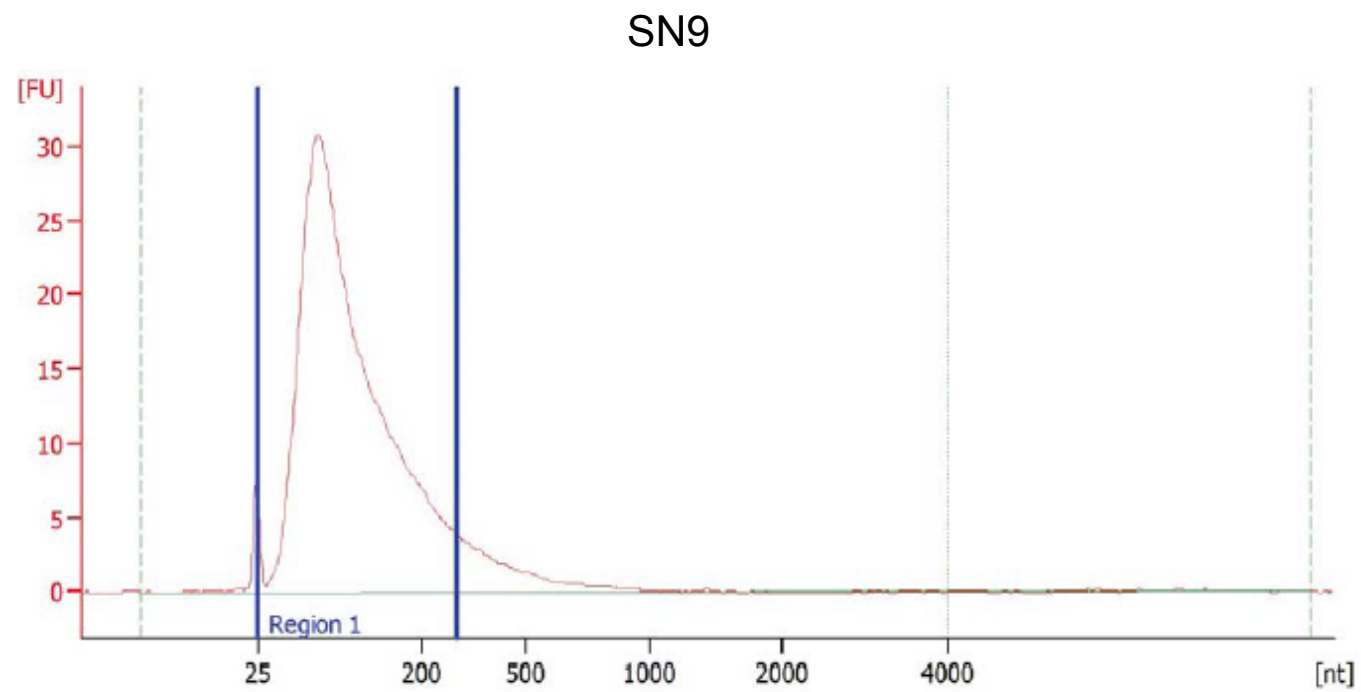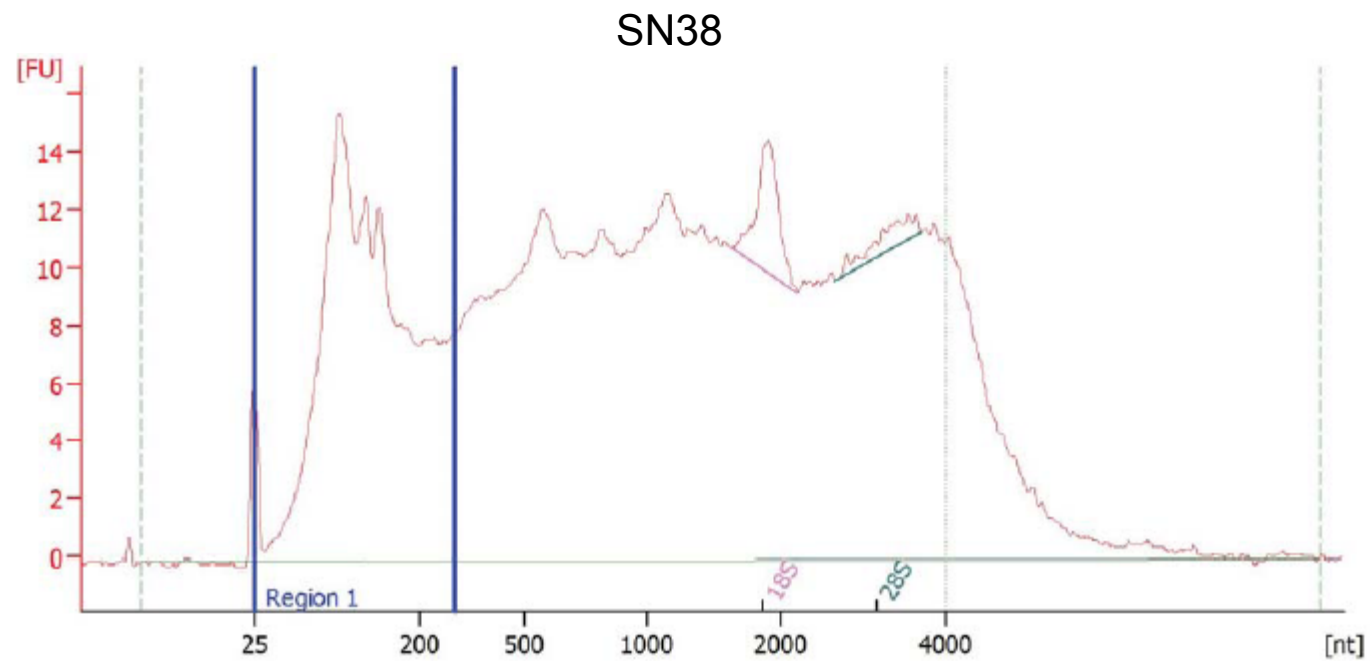

**Supplementary Figure 1.** Representative Bioanalyser images for two clinical NCSLC samples, i.e. SN9 representing a poor quality RNA sample and SN38 representing a good quality sample.

Samples

Raw data

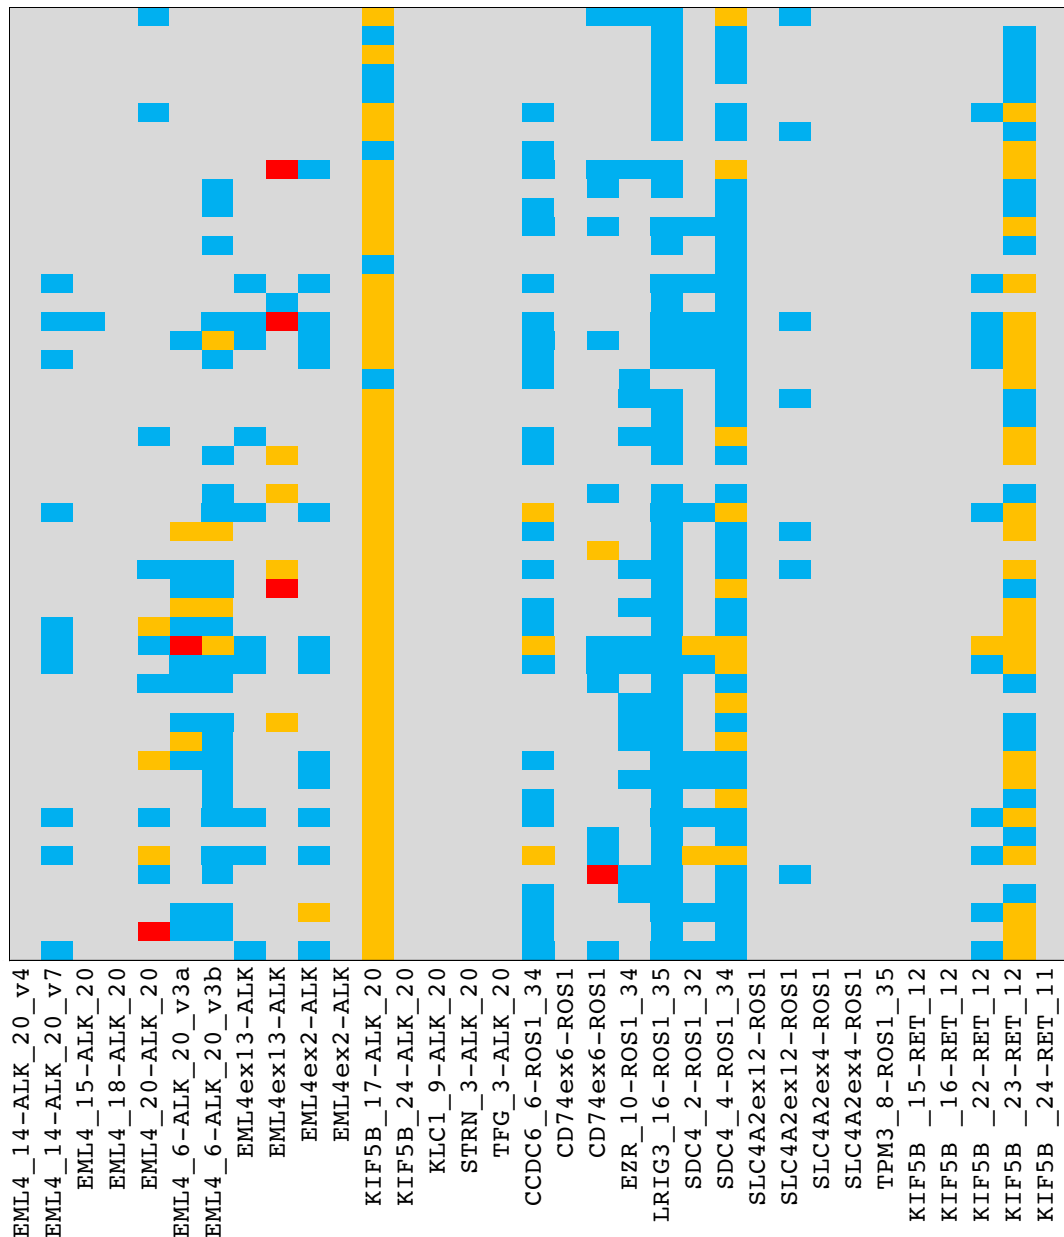

Normalised data

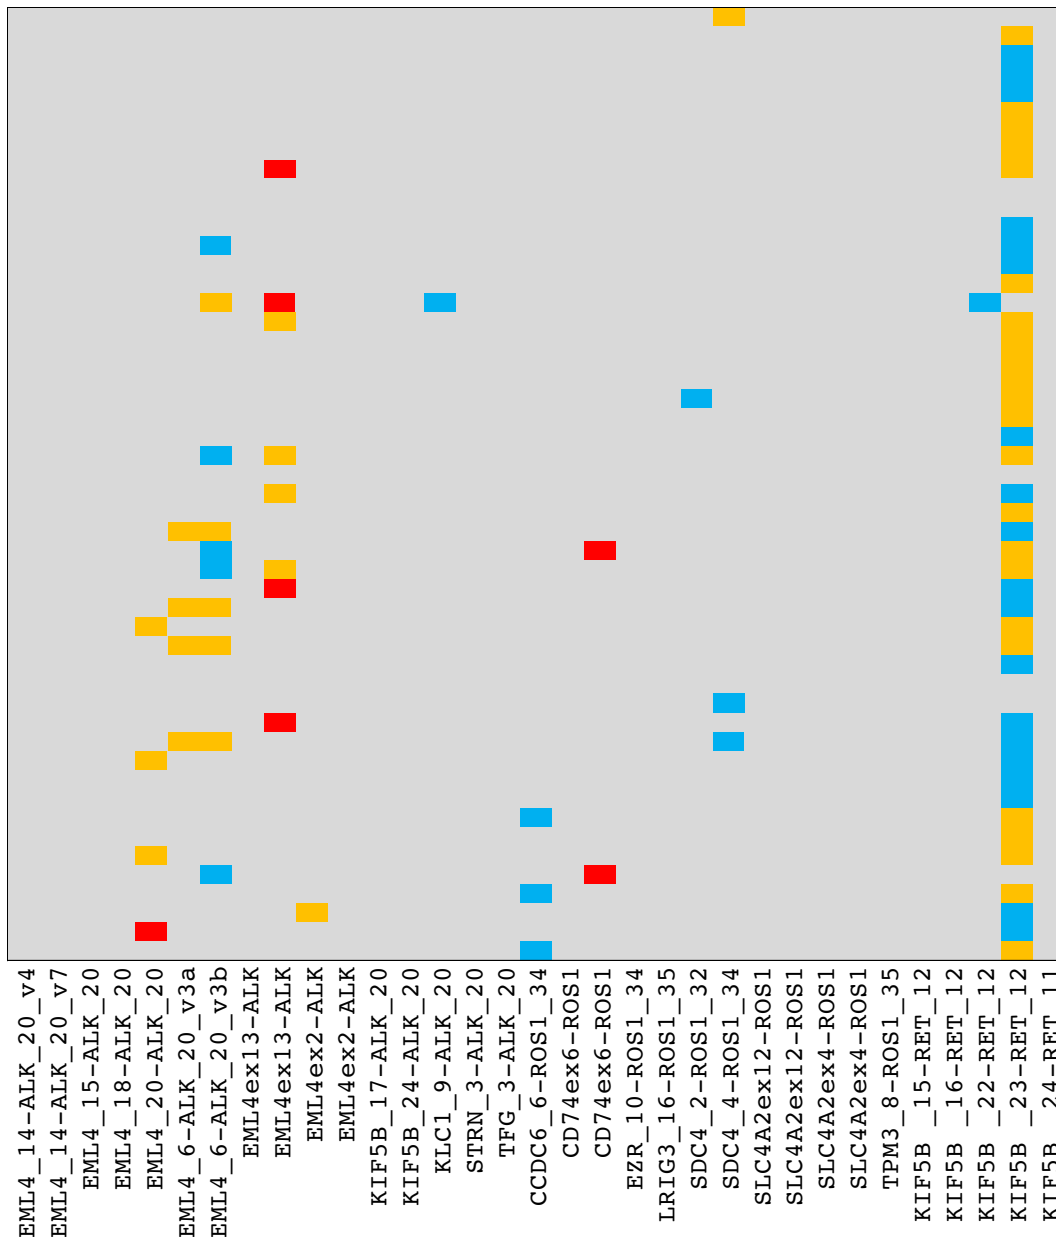

Counts

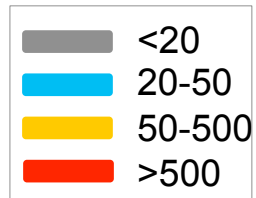

**Supplementary Figure 2. Raw vs. normalised values in the Nanostring analysis.** After normalisation, counts above 50 were considered positive.

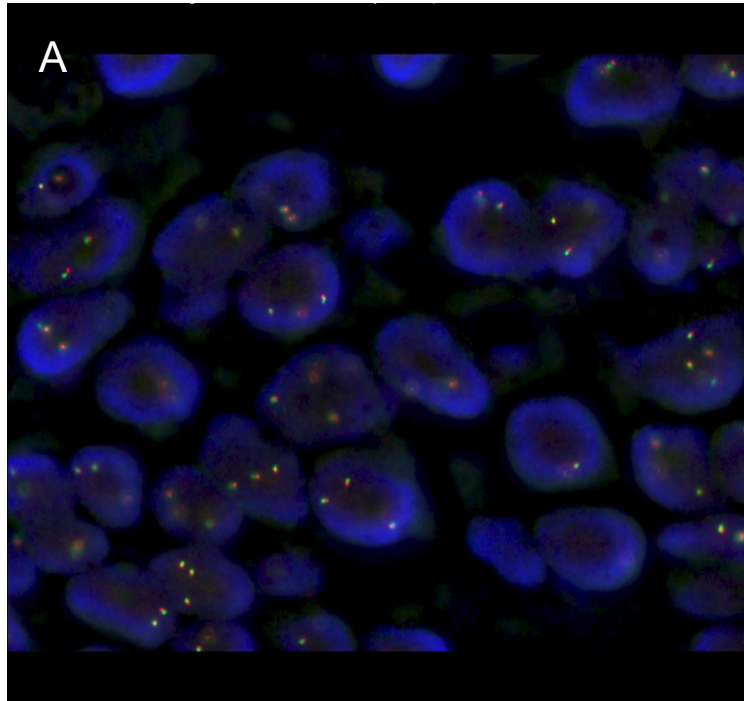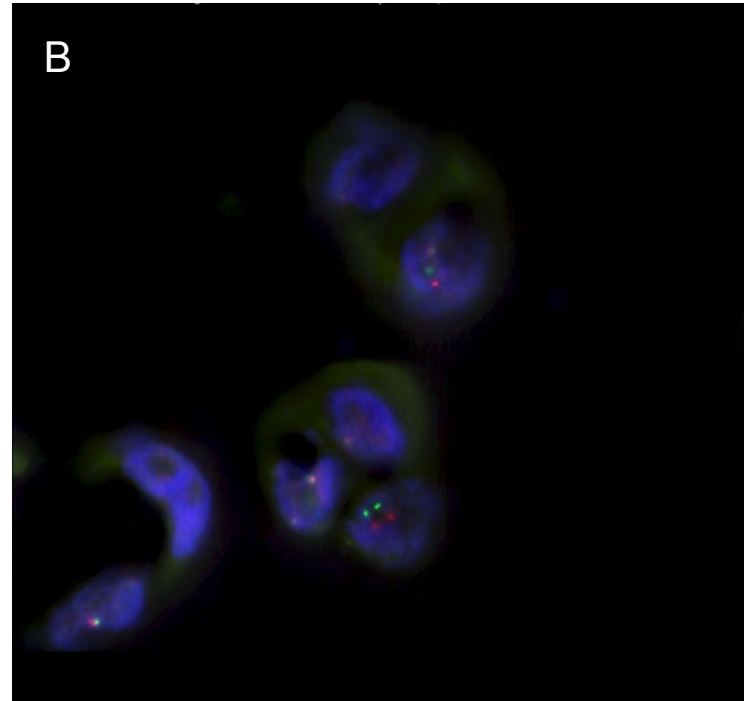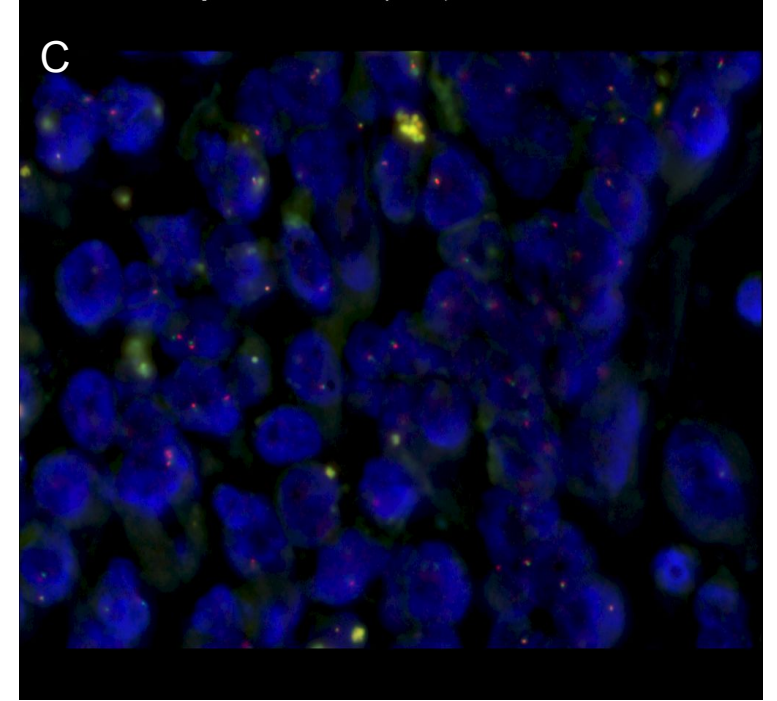

**Supplementary Figure 3. *ALK* signal patterns observed by FISH.** (A) A non-*ALK*-rearranged tumor. (B) An *ALK*-rearranged tumor with a split (greater than two signal widths apart). (C) Sample SN10, An atypical *ALK* FISH result with many narrow breaks and non-specific staining.
